# Supplementary material for: Sustainable and reusable electrospun g-C3N5/MIL-101(Fe)/poly(acrylonitrile-co-maleic acid) nanofibers for photocatalytic degradation of emerging pharmaceutical pollutants
Source: Royal Society of Chemistry journal article supplement (doi:10.1039/d2nj02029g), 2022-01-01
Supplement: d2nj02029g1.pdf [file d2nj02029g1.pdf]

1  
2  
3  
4  
5  
6  
7  
8  
9  
10  
11  
12  
13  
14  
15  
16  
17  
18

Supporting Information

**Sustainable and reusable electrospun g-C<sub>3</sub>N<sub>5</sub>/MIL-101(Fe)/poly(acrylonitrile-co-maleic acid) nanofiber for photocatalytic degradation of carbamazepine**

Dongying Zhu,<sup>a,b,‡</sup> Zhujun Huang,<sup>a,b,‡</sup> Haiyan Wang,<sup>b</sup> Qiujuan Lu,<sup>b</sup> Guihua Ruan,<sup>a</sup>

Chenxi Zhao,<sup>b</sup> Fuyou Du<sup>a, b\*</sup>

<sup>a</sup>Guangxi Key Laboratory of Electrochemical and Magnetochemical Functional Materials, College of Chemistry and Bioengineering, Guilin University of Technology, Guilin 541004, China

<sup>b</sup>College of Biological and Environmental Engineering, Changsha University, Changsha 410022, China

<sup>‡</sup>Dongying Zhu and Zhujun Huang contributed equally to this work.

## 20 **Text S1**

### 21 **Characteristics of materials**

22       The microstructure and surface morphology of materials were tested by scanning  
23 electron microscope (SEM, Hitachi SU8000, Japan) and transmission electron  
24 microscope (TEM, Tecnai G2 F30, PEI, USA), respectively. The elemental mappings  
25 and chemical compositions of the composites were performed by an energy-dispersive  
26 X-ray spectrometer (EDX) equipped on SEM. The surface area, pore volume and size  
27 of the photocatalysts were estimated by Micromeritics TriStar II 3020 analyzer  
28 (TriStar II 3020, Micromeritics Instrument Corporation, USA). The crystal phases of  
29 the composites were measured by X-ray diffraction (XRD, Bruker D8 Advance,  
30 Germany) with a Cu  $K_{\alpha}$  radiation. The patterns of X-ray photoelectron spectroscopy  
31 were measured on a K-Alpha spectrometer (XPS, Thermo escalab 250Xi, Thermo  
32 Scientific, USA). The chemical bonds analysis was investigated by the Nicolet  
33 Nexus 470 FT-IR spectrometer (Thermo Electron Corporation, USA). The active  
34 species to degrade carbamazepine were detected through trapping by BQ, t-BuOH,  
35 and EDTA-2Na (see Text S2). The characteristic signals of hydroxyl radicals ( $\bullet\text{OH}$ )  
36 and superoxide anion radicals ( $\bullet\text{O}_2^-$ ) were identified by electron spin resonance (ESR,  
37 Bruker A300-10/12, Germany), respectively. Photocatalytic degradation tests were  
38 carried out at room temperature under visible light irradiation (300W Xe lamp, CEL-  
39 HXF300, Aulight Co. Ltd., China) that equipped with a 380 nm cut-off filter ( $\lambda > 380$   
40 nm).

## 42 **Text S2**

### 43 **Trapping experiments of active species**

44 To probe the active species in degradation process, different scavengers (0.4  
45 mmol) were added in sample solution besides E-spun g-C<sub>3</sub>N<sub>5</sub>/MIL-  
46 101(Fe)/PANCMA (20 mg), deionized water (20 mL) and carbamazepine solution (20  
47 mL, 40 mg/L). Here benzoquinone (BQ, 0.5 mmol/L), tertiary butanol (t-BuOH, 5.0  
48 mmol/L), and ethylene diamine tetraacetic acid disodium salt (EDTA-2Na, 1.0  
49 mmol/L) were chosen as radical scavengers to capture superoxide radicals ( $\bullet\text{O}_2^-$ ),  
50 hydroxyl radicals ( $\bullet\text{OH}$ ), and holes ( $\text{h}^+$ ), respectively.

## 51 **Text S3**

### 52 **LC-UV-MS analysis**

53 UltiMate 3000 UHPLC (Thermo Fisher Scientific, USA), equipped with the  
54 Zorbax Eclipse Plus C18 column (4.6×250 mm, 5  $\mu\text{m}$ ), was used to detect the residual  
55 carbamazepine in sample solution. The possible intermediates of carbamazepine  
56 during the degradation process were identified by LC-MS (Q Exactive Focus MS,  
57 Thermo Scientific, USA).

58 For LC analysis, the mobile phase was composed of water (A, 60%) and  
59 acetonitrile (B, 40%) at a flow rate of 0.2 mL/min. The volume was 5  $\mu\text{L}$ . The  
60 detection wavelength was 285 nm, and the column temperature was 30 °C. The  
61 typical LC chromatograms are shown in Fig. S2, and the obtained calibration curve  
62 was presented in Table S2.

63 For MS analysis, the MS analysis parameters were operated in the range of 50-  
64 500 m/z with a positive ion mode using ESI ion source. The sheath gas, aux gas,

65 spray voltage, capillary temperature, and aux gas heater temperature was 35  
66 arbitrary units, 10 arbitrary units, 3500 V, 350 °C, and 300 °C, respectively. The  
67 obtained total ion chromatograms and MS fragments (m/z) were shown in Figs. S3  
68 and S4, respectively.

## 70 Tables

71

72 Table S1 Calibration curve, linearity, linear regression coefficient ( $R^2$ ), and limit of  
73 detection (LOD) for determination of carbamazepine, ciprofloxacin, and tetracycline  
74 by HPLC-UV method

| Compound      | Detection wavelength | Calibration curve  | Linearity (ng/mL) | $R^2$  | LOD (ng/mL) | RSD (%) |
|---------------|----------------------|--------------------|-------------------|--------|-------------|---------|
| Carbamazepine | 285 nm               | $y=18.287x+2292.7$ | 5-1000            | 0.9992 | 2.34        | 1.89    |
| Ciprofloxacin | 275 nm               | $y=11.279x+2457.0$ | 5-1000            | 0.9999 | 3.27        | 2.15    |
| Tetracycline  | 355 nm               | $y=5.986x+1511.6$  | 5-1000            | 0.9998 | 4.09        | 3.37    |

75 *Note:* The limit of detection (LOD) was evaluated on the basis of a signal-to-noise ratio of 3.

77 Table S2 Results of N<sub>2</sub> adsorption-desorption characteristics on the E-spun PANCMA  
 78 and g-C<sub>3</sub>N<sub>5</sub>/MIL-101(Fe)/PANCMA NFs

| Property     | Parameter                                                                                                                  | PANCM     | g-C <sub>3</sub> N <sub>5</sub> / | MIL- |
|--------------|----------------------------------------------------------------------------------------------------------------------------|-----------|-----------------------------------|------|
|              |                                                                                                                            | A         | 101(Fe)/PANCMA                    |      |
| Surface Area | Single point surface area at P/Po (m <sup>2</sup> /g)                                                                      | 24.9760   | 21.6322                           |      |
|              | BET Surface Area (m <sup>2</sup> /g)                                                                                       | 25.8848   | 22.3689                           |      |
|              | t-Plot External Surface Area (m <sup>2</sup> /g)                                                                           | 26.1887   | 22.2204                           |      |
| Area         | BJH Adsorption cumulative surface area of pores between 1.7000 nm and 300.0000 nm diameter (m <sup>2</sup> /g)             | 25.036    | 21.673                            |      |
|              | BJH Desorption cumulative surface area of pores between 1.7000 nm and 300.0000 nm diameter (m <sup>2</sup> /g)             | 46.0199   | 45.4090                           |      |
| Pore Volume  | Single point adsorption total pore volume of pores less than 130.9985 nm diameter at P/Po=0.985000000 (cm <sup>3</sup> /g) | 0.134838  | 0.091247                          |      |
|              | t-Plot micropore volume (cm <sup>3</sup> /g)                                                                               | -0.000190 | 0.000056                          |      |
| Volume       | BJH Adsorption cumulative volume of pores between 1.7000 nm and 300.0000 nm width (cm <sup>3</sup> /g)                     | 0.138315  | 0.095571                          |      |
|              | BJH Desorption cumulative volume of pores between 1.7000 nm and 300.0000 nm diameter (cm <sup>3</sup> /g)                  | 0.140227  | 0.097206                          |      |
| Pore Size    | Adsorption average pore width (4V/A by BET) (nm)                                                                           | 20.83660  | 16.31683                          |      |
|              | BJH Adsorption average pore width (4V/A) (nm)                                                                              | 22.0990   | 17.6388                           |      |
|              | BJH Desorption average pore width (nm)                                                                                     | 12.1884   | 8.5672                            |      |

81

82 TableS 3 Comparison of the developed g-C<sub>3</sub>N<sub>5</sub>/MIL-101(Fe)/PANCMA nanofibers

83 with the other reported photocatalytical materials for removal of carbamazepine

84

| Materials                                                                           | Removal mode               | Time (min) | Removal efficiency | Cycle times | Referen<br>cev |
|-------------------------------------------------------------------------------------|----------------------------|------------|--------------------|-------------|----------------|
| $\alpha$ -Fe <sub>2</sub> O <sub>3</sub> /MIL-101(Cr)                               | Photocatalytic degradation | 180        | 100%               | 4           | [42]           |
| Bis-PDI-T@TiO <sub>2</sub>                                                          | Photocatalytic degradation | 30         | 95%                | 4           | [43]           |
| TiO <sub>2</sub> /carbon dots/polyaniline                                           | Photocatalytic degradation | 60         | 77.63%-83.29%      | 5           | [45]           |
| Co <sub>3</sub> O <sub>4</sub> /CuBi <sub>2</sub> O <sub>4</sub> /SmVO <sub>4</sub> | Photocatalytic degradation | 300        | 76.1%              | 4           | [46]           |
| AgIO <sub>3</sub> /BiVO <sub>4</sub>                                                | Photocatalytic degradation | 60         | 97.86%             | 1           | [47]           |
| E-spun g-C <sub>3</sub> N <sub>5</sub> /MIL-101(Fe)/PANCMA nanofibers               | Photocatalytic degradation | 40         | 94.2%              | 15          | This work      |

85

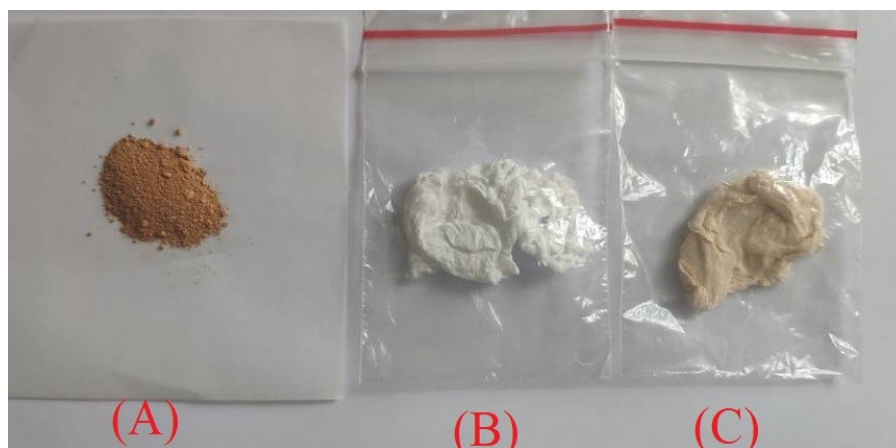

88

89 **Figure S1** The appearance of g-C<sub>3</sub>N<sub>5</sub>/MIL-101(Fe) composites (A), E-spun90 PANCMA (B), and E-spun g-C<sub>3</sub>N<sub>5</sub>/MIL-101(Fe)/PANCMA (C) nanofibers

91

92

93



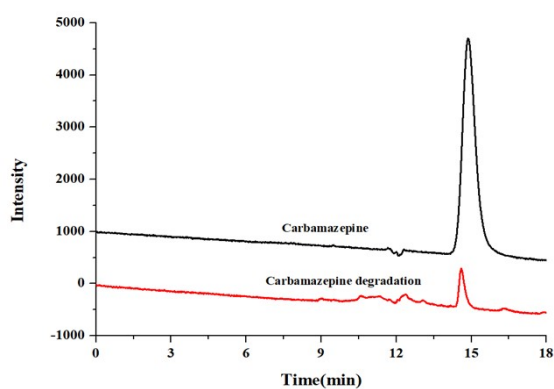

(A)

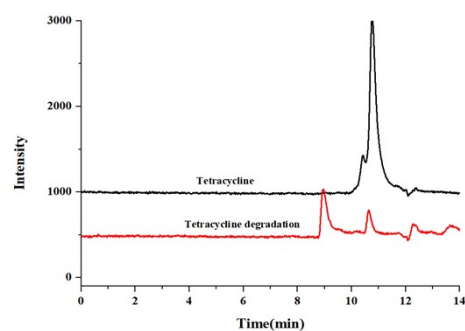

(B)

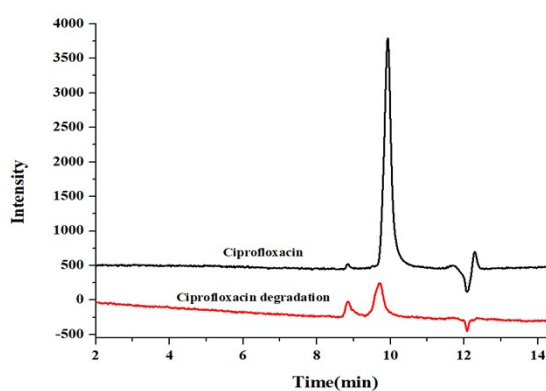

(C)

96 **Figure S2** Typical HPLC-UV chromatograms of carbamazepine (A), tetracycline (B),  
97 and ciprofloxacin (C) before and after photocatalytical degradation with E-spun g-  
98  $C_3N_5/MIL-101(Fe)/PANCMA$  NFs. The original concentration spiked in sample  
99 solution was 200 ng/mL.

100

101

103

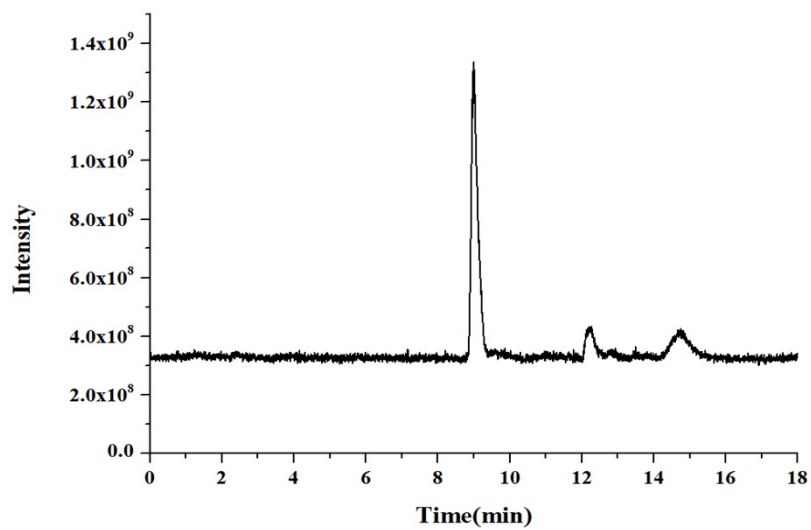

104

105 **Figure S3** Typical total ion chromatograms of degradation products by photocatalytic  
106 degradation of carbamazepine with E-spun g-C<sub>3</sub>N<sub>5</sub>/MIL-101(Fe)/PANCMA  
107 nanofibers.

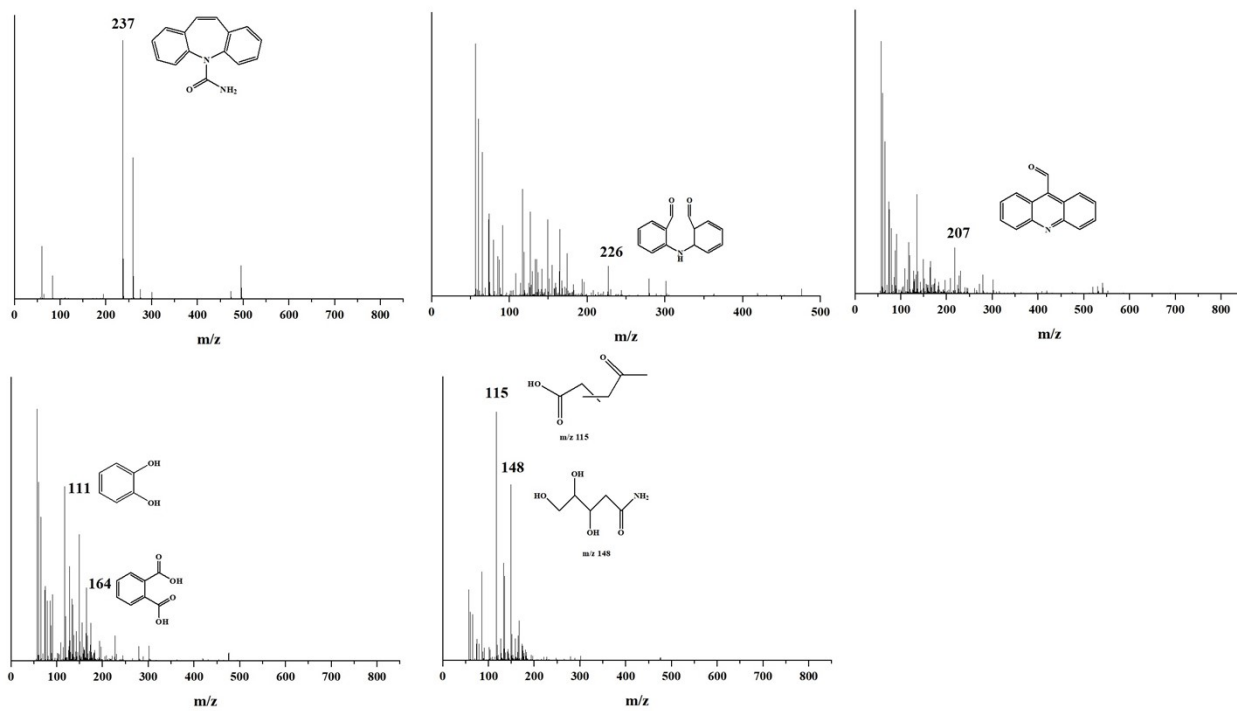

110

111 **Figure S4** Typical MS of photodegradation products obtained by LC-MS method.

113

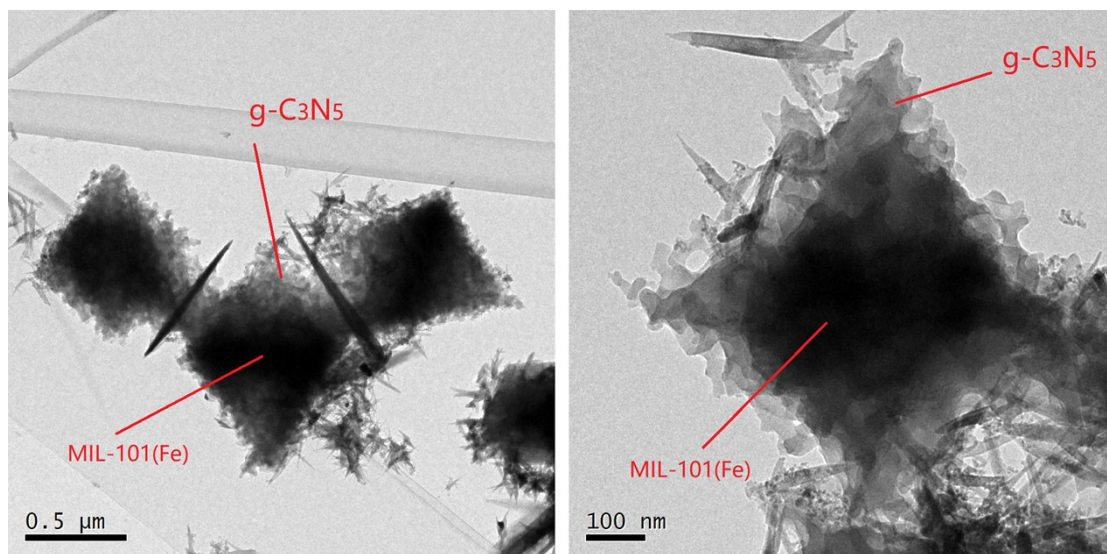

114

115

Figure S5 TEM images of g-C<sub>3</sub>N<sub>5</sub>/MIL-101(Fe) composites.

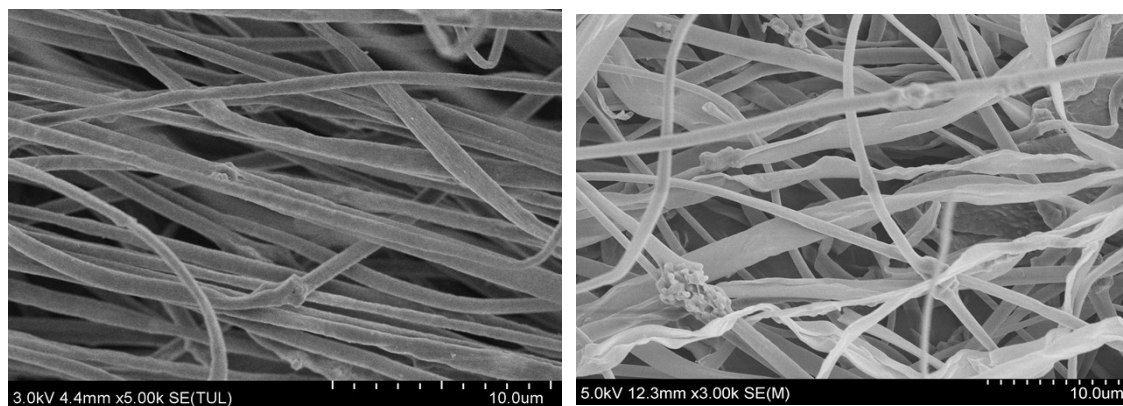

(A)

(B)

118 **Figure S6** SEM images of E-spun  $g\text{-C}_3\text{N}_5/\text{MIL-101}(\text{Fe})/\text{PANCMA}$  NFs before and  
119 after consecutive 20 cycle times of photocatalytic degradation process.

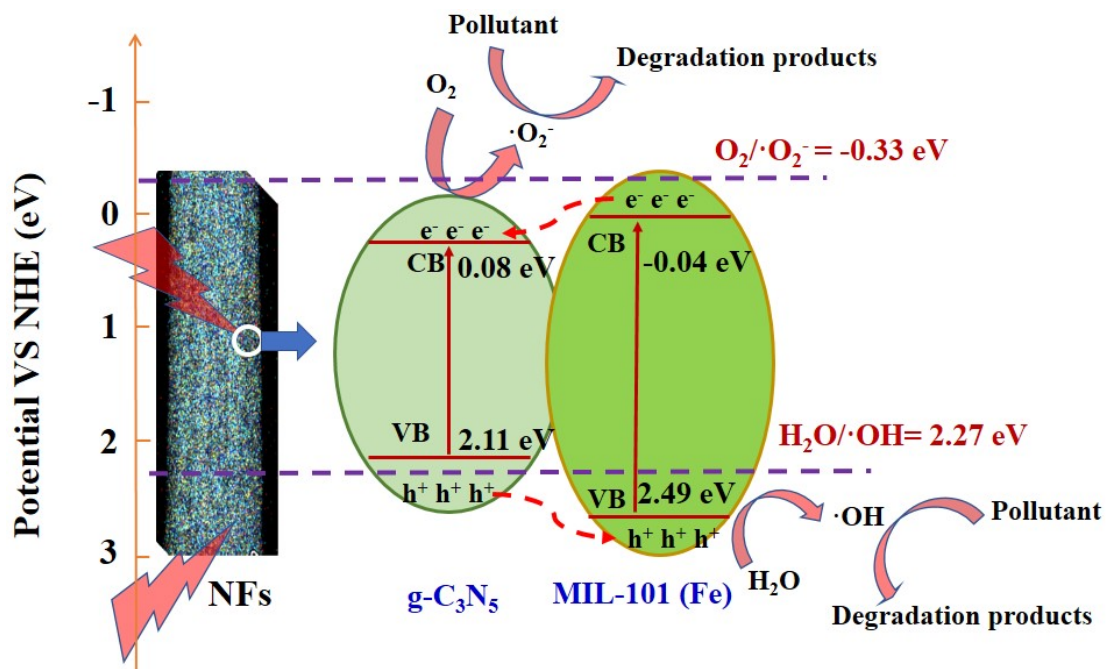

121

122 Figure S7 The possible degradation mechanism of  $g-C_3N_5/MIL-101(Fe)/PANCMA$

123

towards carbamazepine pollutant.

124
